# Supplementary material for: Angiogenin mutations in Hungarian patients with amyotrophic lateral sclerosis: Clinical, genetic, computational, and functional analyses
Source: PubMed Central journal article supplement (PMC6576160; doi:10.1002/brb3.1293), 2019-04-25

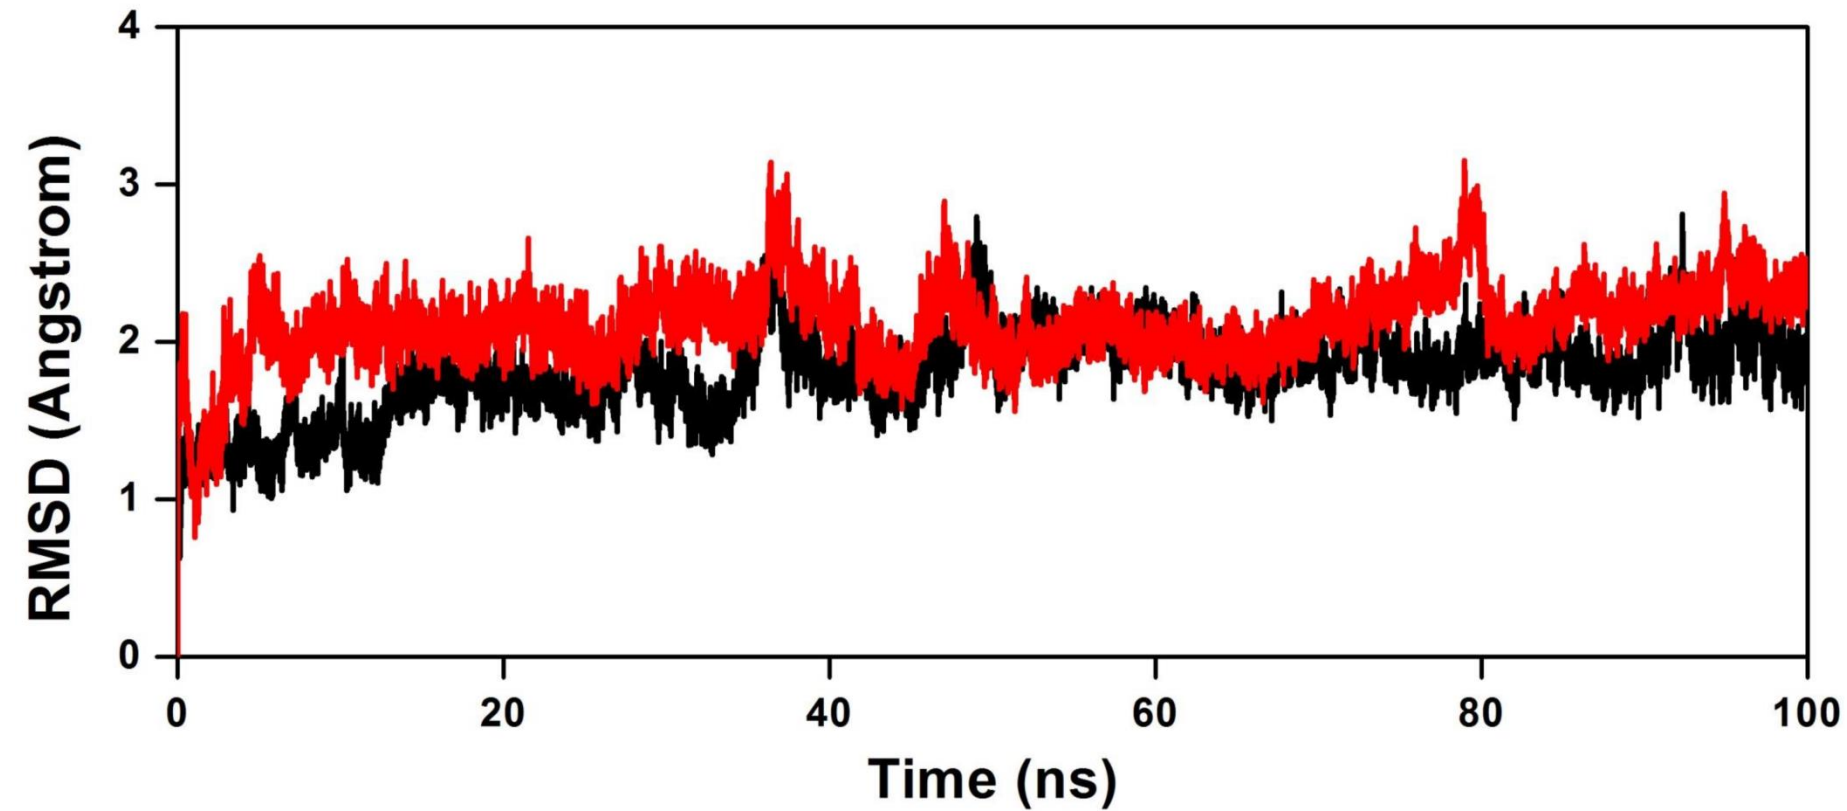

Supplement: BRB3-9-e01293-s001.pdf [file BRB3-9-e01293-s001.pdf]
